# Supplementary material for: Deep learning to diagnose Hashimoto’s thyroiditis from sonographic images
Source: PubMed Central journal article supplement (PMC9243092; doi:10.1038/s41467-022-31449-3), 2022-06-29
Supplement: 41467_2022_31449_MOESM1_ESM.pdf [file 41467_2022_31449_MOESM1_ESM.pdf]

**Title: Deep learning to diagnose Hashimoto's thyroiditis from  
sonographic images**

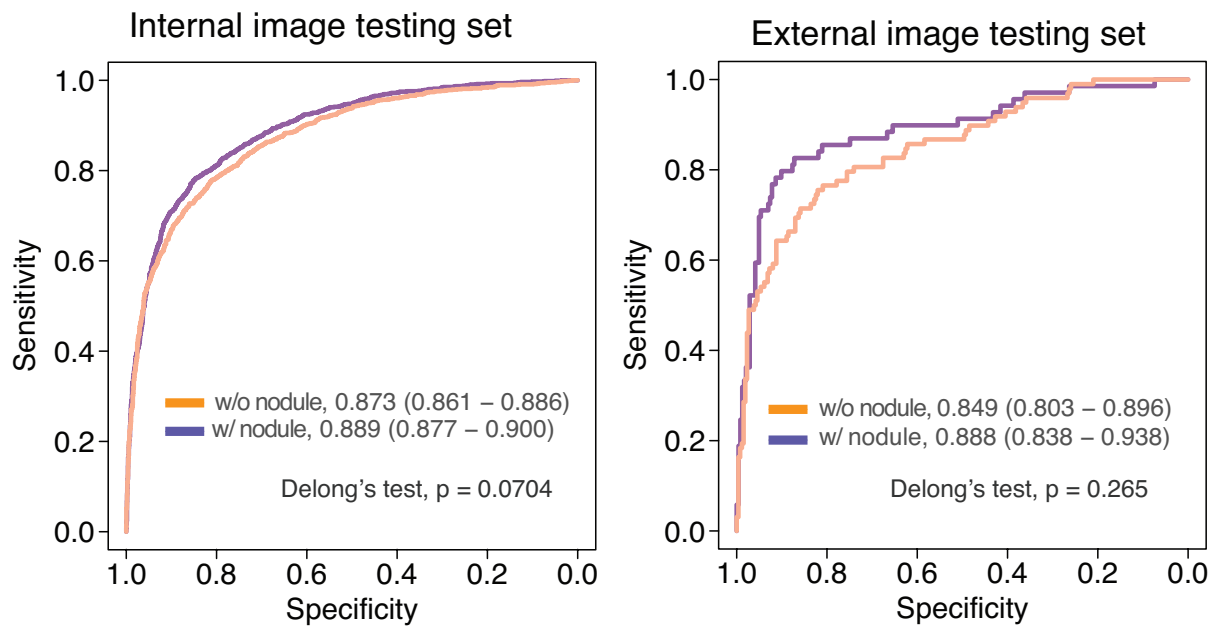

**Supplementary Fig. 1.** The ROC curve and AUC of HTNet on the internal- and external-testing sets on image sets with and without nodules. Area under the operating curve and associated 95% confidence intervals are included. Two-sided Delong's test was used to evaluate the difference between two ROC curves. w/o, without; w/, with.

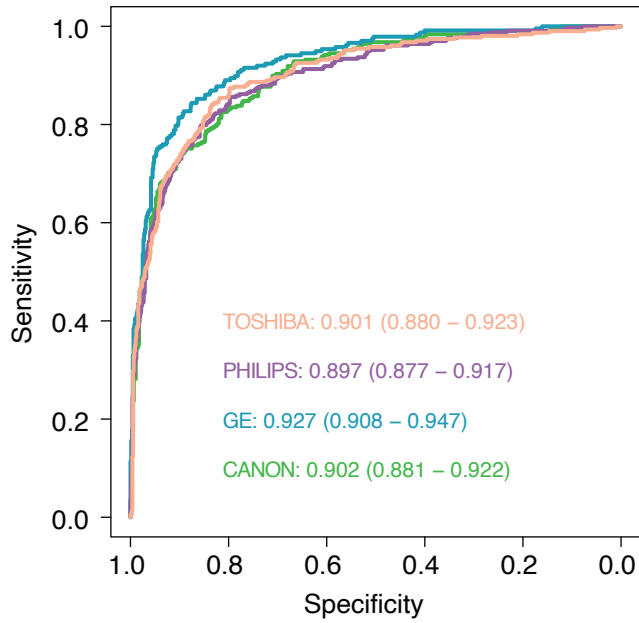

**Supplementary Fig. 2.** The ROC curves of HTNet on image sets stratified by manufacturers. Area under the operating curve and associated 95% confidence intervals are included.

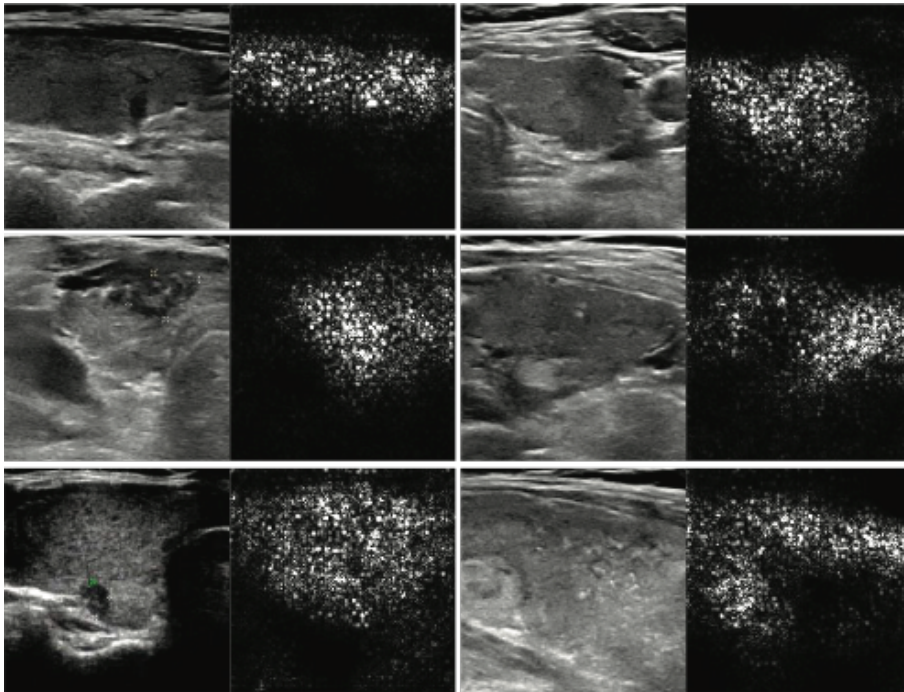

**Supplementary Fig. 3.** Exemplified class activation maps.

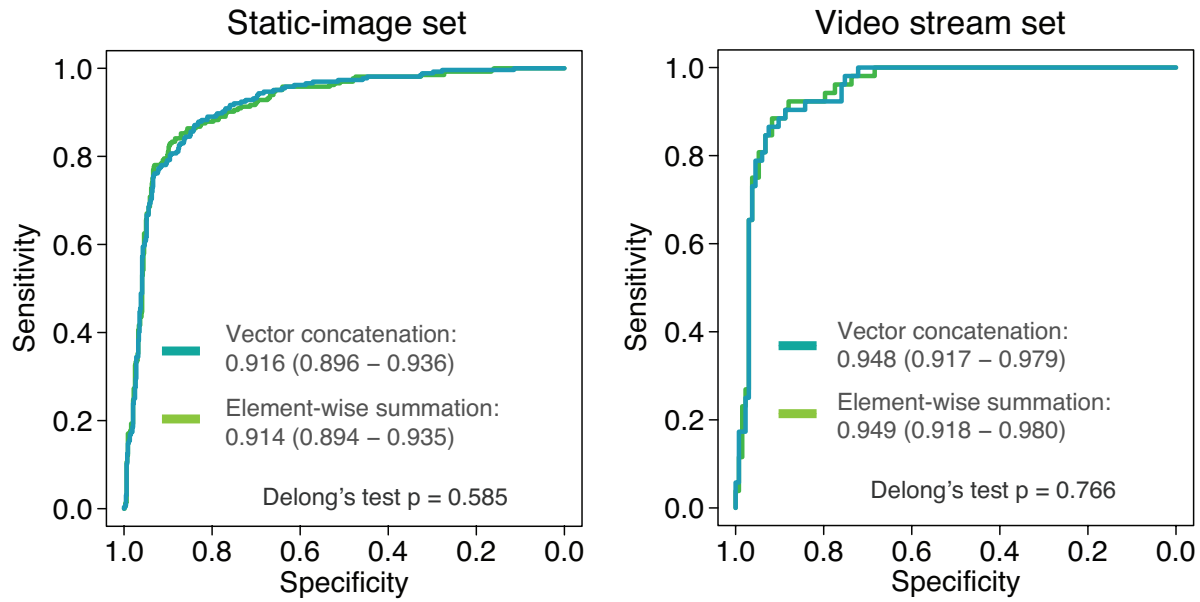

**Supplementary Fig. 4.** The ROC curves of HTNet for combining image features with serologic markers via element-wise summation and vector concatenation. Two-sided Delong's test was used. Area under the operating curve and associated 95% confidence intervals are included. Two-sided Delong's test was used to evaluate the difference between two ROC curves.

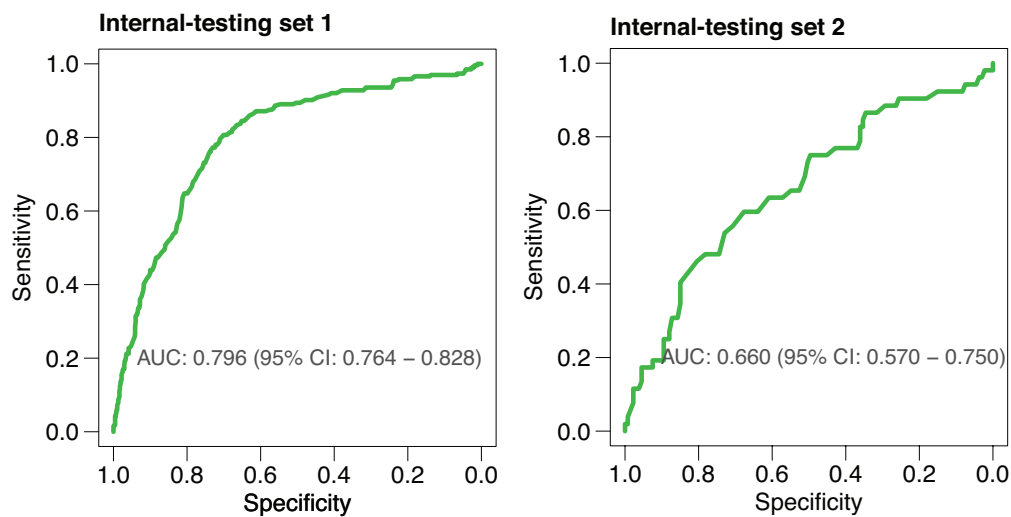

**Supplementary Fig. 5.** The ROC curves of random forest classifier in the diagnosis of HT on the first and second testing sets by using serologic markers.

**Supplementary Table 1. Classification metrics of random forest classifier in the diagnosis of**

**HT by using serologic markers**

| <b>Classification metrics</b> | <b>Internal-testing set (n = 945)</b> | <b>Internal-testing set (n = 185)</b> |
|-------------------------------|---------------------------------------|---------------------------------------|
| Accuracy (95% CI)             | 0.730 (0.701 - 0.758)                 | 0.654 (0.581 - 0.722)                 |
| SN (95% CI)                   | 0.807 (0.754 - 0.853)                 | 0.596 (0.451 - 0.730)                 |
| SP (95% CI)                   | 0.700 (0.664 - 0.735)                 | 0.677 (0.590 - 0.755)                 |
| PPV (95% CI)                  | 0.511 (0.462 - 0.560)                 | 0.419 (0.305 - 0.539)                 |
| NPV (95% CI)                  | 0.903 (0.875 - 0.927)                 | 0.811 (0.725 - 0.879)                 |
| Kappa                         | 0.431                                 | 0.242                                 |
| F1                            | 0.626                                 | 0.492                                 |
